# Supplementary material for: Interactions of nuclear transport factors and surface-conjugated FG nucleoporins: Insights and limitations
Source: PubMed Central journal article supplement (PMC6553764; doi:10.1371/journal.pone.0217897), 2019-06-06
Supplement: pone.0217897.s001.pdf [file pone.0217897.s001.pdf]

**S1 Text. Primary sequences of the protein constructs.**

**Nsp1FG-Cys-His<sub>6</sub>**

MSTGAGAFGTGQSTFGFNNSAPNNTNNANSSITPAFGSNNTGNTAFGNSNPTS NVFGSNSTTNT  
FGSNSAGTSLFGSSSAQQTKSNGTAGGNTFGSSSLFNNSTNSNTTKPAFGGLNFGGGNNTTPSST  
GNANTSNNLFGATANANKPAFSFGATTNDDKKTEPDKPAFSFNSSVGNKTDAQAPTTGFSFGSQ  
LGGNKTVNEAAKPSLSFGSGSAGANPAGASQPEPTTNEPAKPALSFGTATSDNKTTNTTPSFSFG  
AKSDENKAGATSKPAFSFGAKPEEKKDDNSSKPAFSFGAKSNEDKQDGTAKPAFSFGAKPAEKN  
NNETSKPAFSFGAKSDEKKDGDASKPAFSFGAKPDENKASATSKPAFSFGAKPEEKKDDNSSKPA  
FSFGAKSNEDKQDGTAKPAFSFGAKPAEKNNNETSKPAFSFGAKSDEKKDGDASKPAFSFGAKS  
DEKKDSOSSKPAFSFGTKSNEKKDSGSSKPAFSFGAKPDEKKNDEVSKPAFSFGAKANEKKESDE  
SKSAFSFGSKPTGKEEGDGAKAAISFGAKPEEQSSDTSKPAFTFGCLEHHHHHHH\*

**FSFG<sub>6</sub>-Cys-His<sub>6</sub>**

MNETSKPAFSFGAKSDEKKDGDASKPAFSFGAKPDENKASATSKPAFSFGAKPEEKKDDNSSKPA  
AFSFGAKSNEDKQDGTAKPAFSFGAKPAEKNNNETSKPAFSFGAKSDEKKDGDASKPACLEHHH  
HHH\*

**SSSG<sub>6</sub>-Cys-His<sub>6</sub>**

MNETSKPASSSGAKSDEKKDGDASKPASSSGAKPDENKASATSKPASSSGAKPEEKKDDNSSKPA  
ASSSGAKSNEDKQDGTAKPASSSGAKPAEKNNNETSKPASSSGAKSDEKKDGDASKPACLEHHH  
HHH\*
