# Supplementary material for: Interactions of nuclear transport factors and surface-conjugated FG nucleoporins: Insights and limitations
Source: PubMed Central journal article supplement (PMC6553764; doi:10.1371/journal.pone.0217897), 2019-06-06

**S1 Fig. Estimating the impact of the mixing lag on the kinetic parameters in QCM-D experiments.**

(A-D) The dependence of Kap95 binding to Nsp1FG surface on the flow rate. The same QCM-D data as in Fig 3B were used here. (A)  $\Delta F_5$  at different flow rates were plotted against the total volume passed through. The grey box indicates the regions magnified in (B). (C) A replicate of Fig 3B. (D) Magnification of the first 0.4 min shown in (C). (E-G) Estimating the mixing lag ( $t_{lag}$ ) based on the volume replacement experiment shown in Fig 3C. (E) Estimate of  $t_{lag}$  at different flow rates.  $t_{lag}$  at each flow rate was calculated as the time it takes to replace 99% of the sensing volume. Volume replacement was tracked by the change in  $\Delta F_5$  with  $\Delta F_5 = 0$  Hz as the initial point and the final asymptotic line ( $\Delta F_5 = \sim 15$  Hz) as the end point. (F) The data show in Fig 3C replotted after normalization by  $\Delta F_5$  at the final asymptotic line. The early time points (up to 1 min) in (F) are magnified in (G).

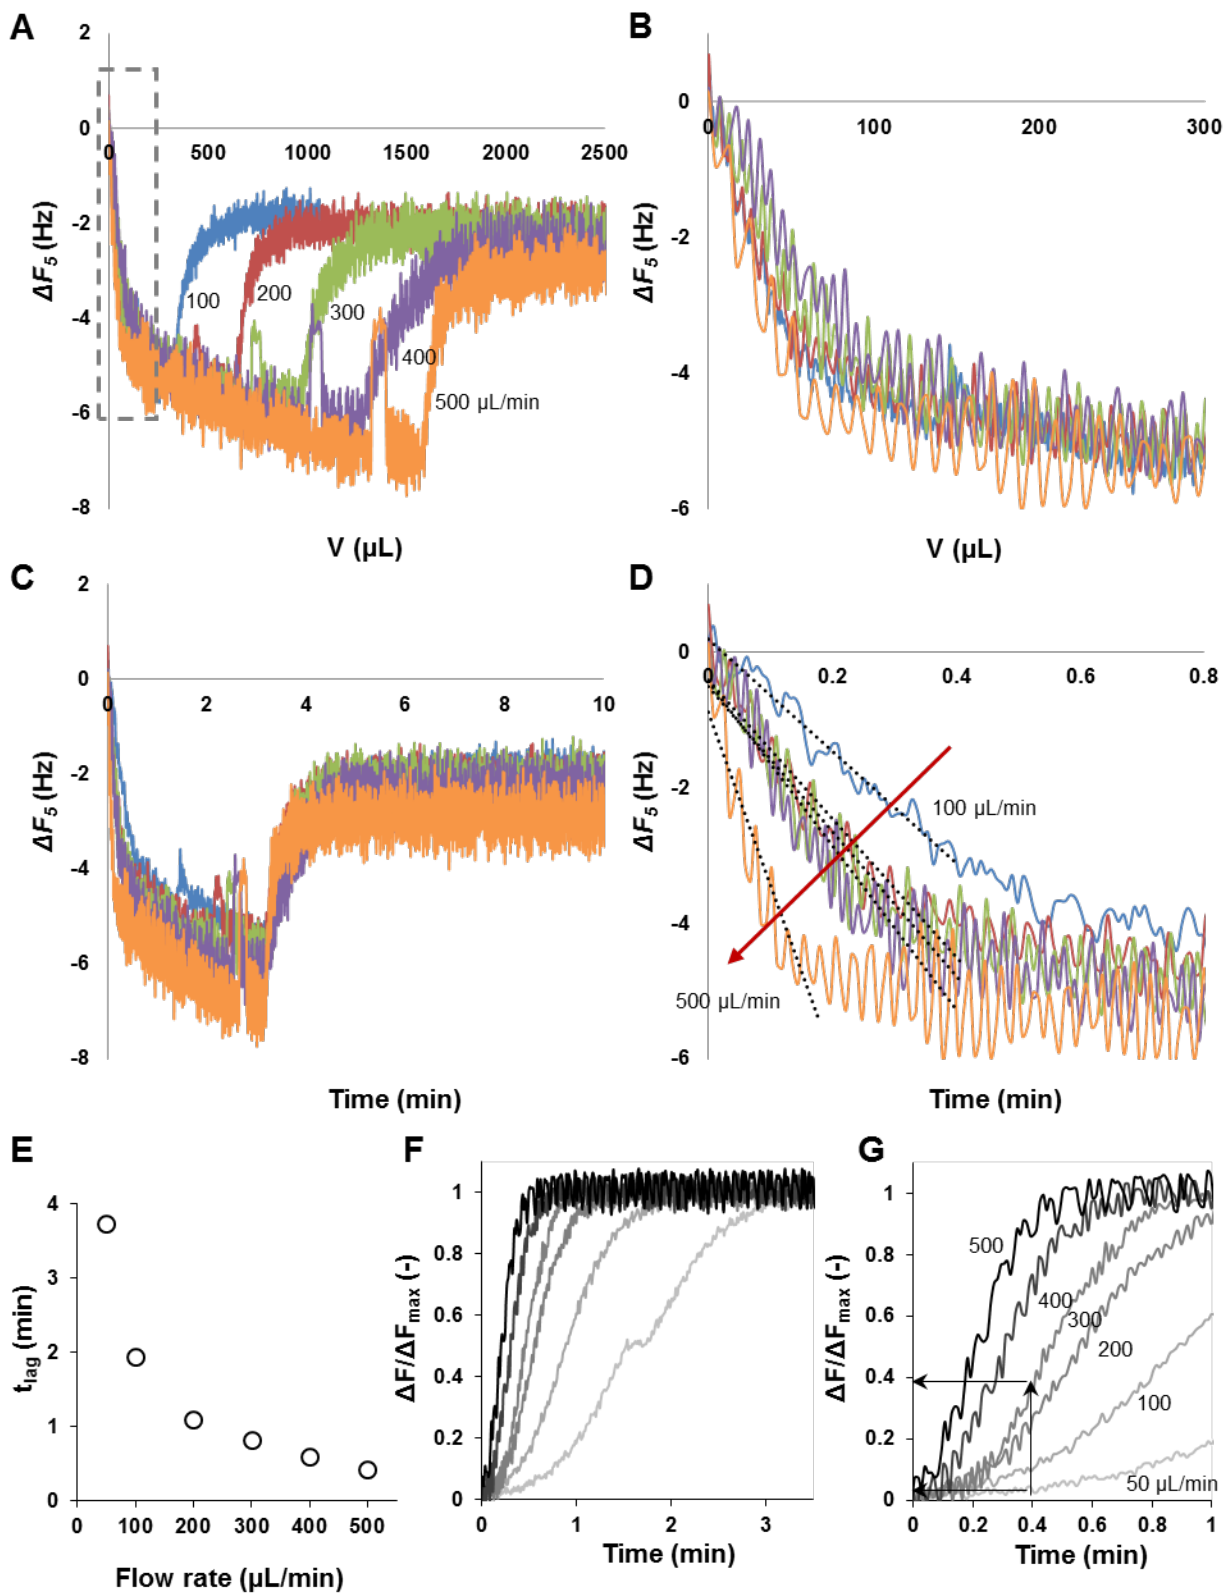

Supplement: pone.0217897.s004.pdf [file pone.0217897.s004.pdf]
