# Supplementary material for: Interactions of nuclear transport factors and surface-conjugated FG nucleoporins: Insights and limitations
Source: PubMed Central journal article supplement (PMC6553764; doi:10.1371/journal.pone.0217897), 2019-06-06

## S2 Fig. QCM-D - Comparison of gold and silica sensor.

Nsp1FG was conjugated via its C-terminal cysteine to silica or gold surface without (A, C) or with mPEG passivation (B, D), respectively. The data shown are from 15 min binding-unbinding experiments to test the inertness of the two different surfaces. 1  $\mu$ M Kap95 was used in all experiments.

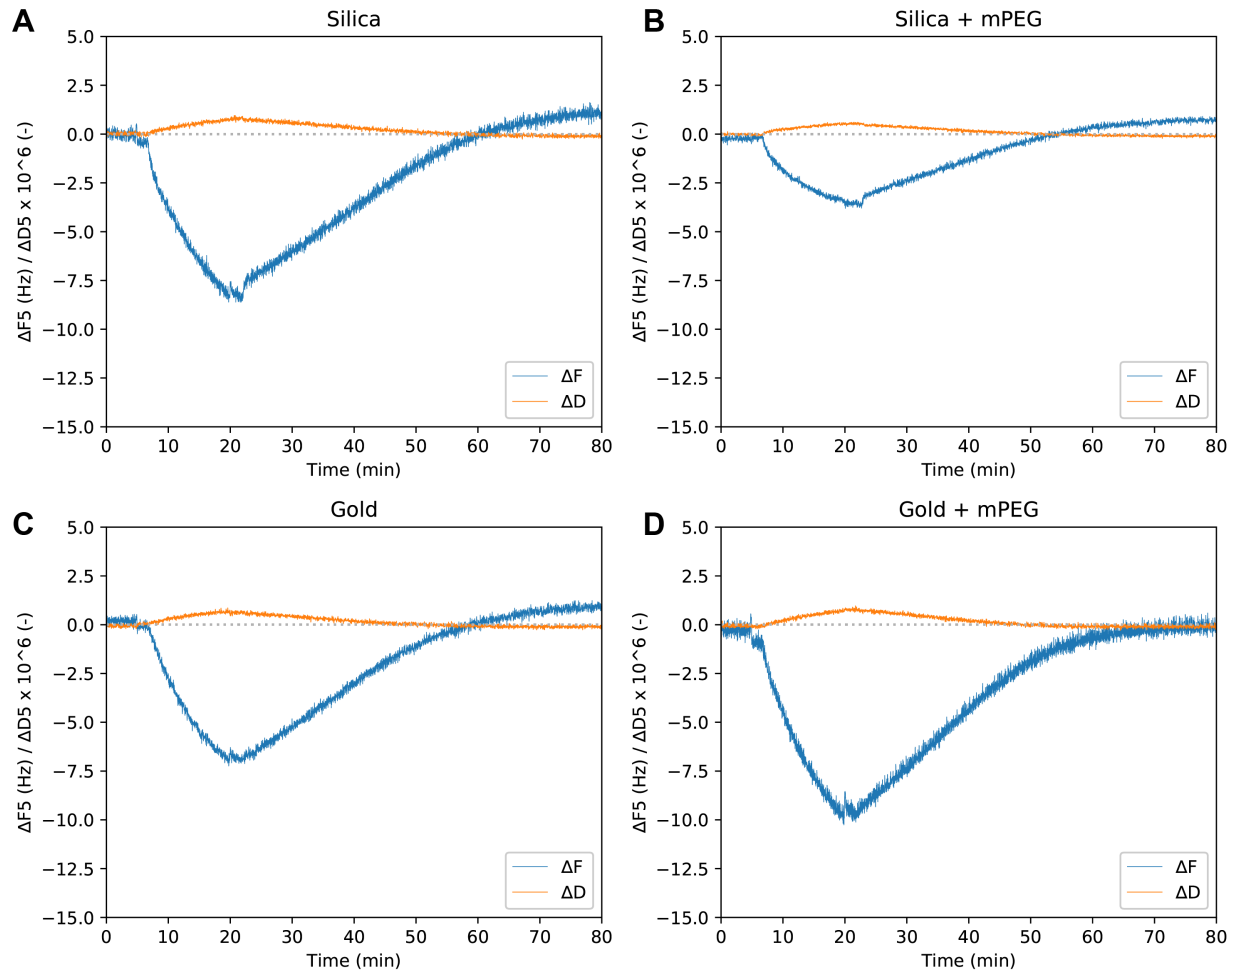

Supplement: pone.0217897.s005.pdf [file pone.0217897.s005.pdf]
