# Supplementary material for: Interactions of nuclear transport factors and surface-conjugated FG nucleoporins: Insights and limitations
Source: PubMed Central journal article supplement (PMC6553764; doi:10.1371/journal.pone.0217897), 2019-06-06

### S3 Fig. QCM-D - Comparison of PEG passivators.

Gold sensors were modified with 2 mM solutions of (A) HS-(CH<sub>2</sub>)<sub>11</sub>-EG<sub>3</sub>-OCH<sub>3</sub> (mPEG<sub>3</sub>), (B) HS-(CH<sub>2</sub>)<sub>11</sub>-EG<sub>3</sub>-OH (hPEG<sub>3</sub>), and (C) HS-(CH<sub>2</sub>)<sub>11</sub>-EG<sub>6</sub>-OH (hPEG<sub>6</sub>) in ethanol, overnight and at room temperature. The data show a 30 min binding-unbinding experiment using a 300 μM BSA solution, in order to test the inertness of the different passivated surfaces.  $\Delta F$  and  $\Delta D$  indicate the change in resonance frequency and dissipation for the 5<sup>th</sup> overtone, respectively.

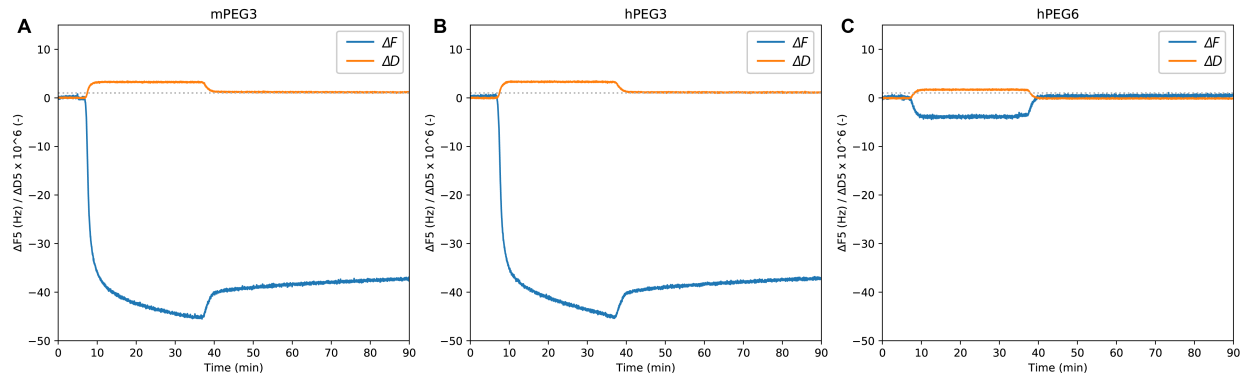

Supplement: pone.0217897.s006.pdf [file pone.0217897.s006.pdf]
