# Supplementary material for: Interactions of nuclear transport factors and surface-conjugated FG nucleoporins: Insights and limitations
Source: PubMed Central journal article supplement (PMC6553764; doi:10.1371/journal.pone.0217897), 2019-06-06

**S5 Fig. QCM-D - Different harmonics during Nsp1FG conjugation.**

The changes in frequency ( $\Delta F$ ) and energy dissipation ( $\Delta D$ ) for several overtones (3<sup>rd</sup>, 5<sup>th</sup>, 7<sup>th</sup>, 9<sup>th</sup>, and 11<sup>th</sup>) recorded in real time during Nsp1FG conjugation are shown. The Nsp1FG conjugation (60 min + 10 min buffer wash) was followed by a HUT wash (5 min), two passivation steps with mPEG (60 + 10 min buffer wash) and beta-mercaptoethanol ( $\beta$ ME) (60 + 10 min buffer wash), and a final HUT wash (5 min). The spreading of the different harmonics indicates the viscoelastic nature of the Nsp1FG layer coupled to the sensor surface.

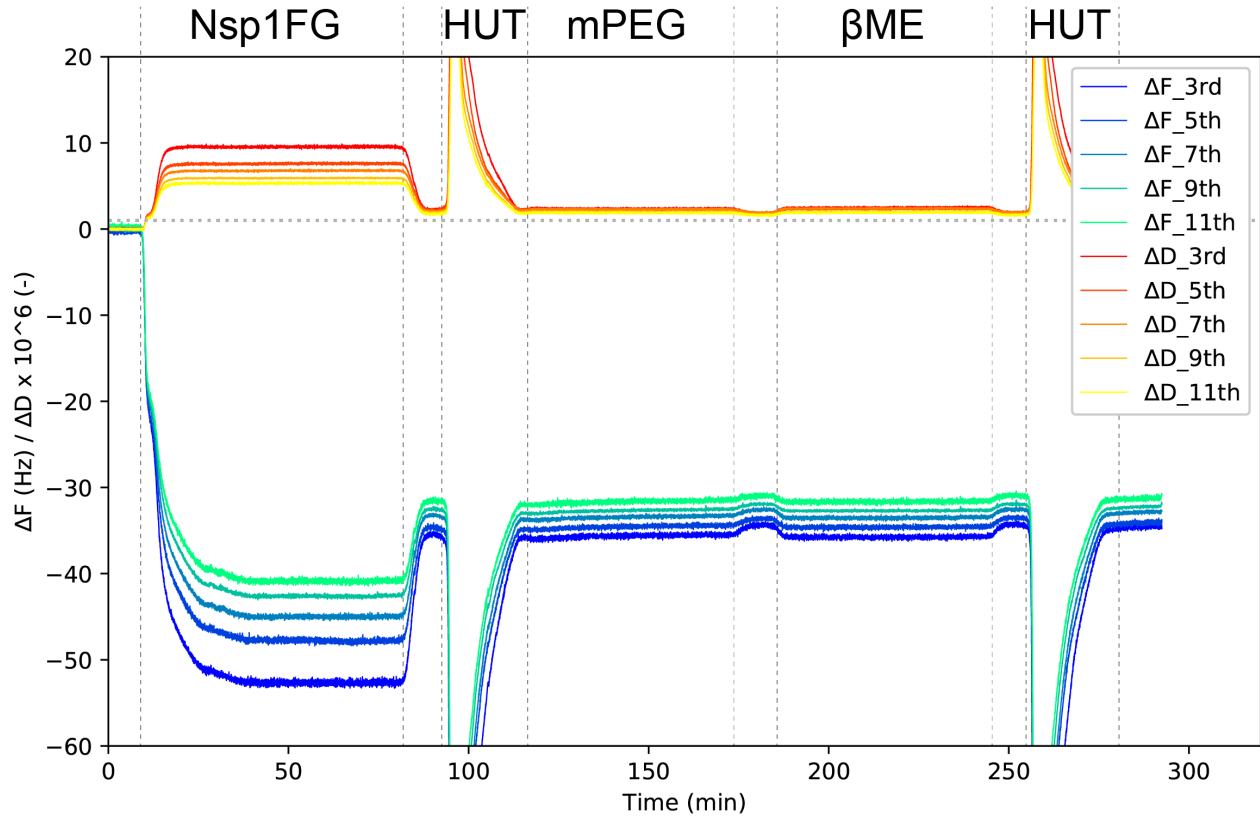

Supplement: pone.0217897.s008.pdf [file pone.0217897.s008.pdf]
