# Supplementary material for: Interactions of nuclear transport factors and surface-conjugated FG nucleoporins: Insights and limitations
Source: PubMed Central journal article supplement (PMC6553764; doi:10.1371/journal.pone.0217897), 2019-06-06

### S8 Fig. AFM - Data fitting using the Worm Like Chain model.

Retraction curves during sNsp1 stretching in PBS are plotted as force,  $F(x)$ , versus sample-cantilever distance,  $x$ , and interpolated with the worm-like chain (WLC) model. Examples are reported for (A) single sNsp1 stretching with no initial adhesion peak (multiple runs are shown); (B) sNsp1 stretching with initial adhesion peak; and (C) multiple stretching events. The fitting line from the WLC model is also reported.

#### A Single stretching (multiple runs)

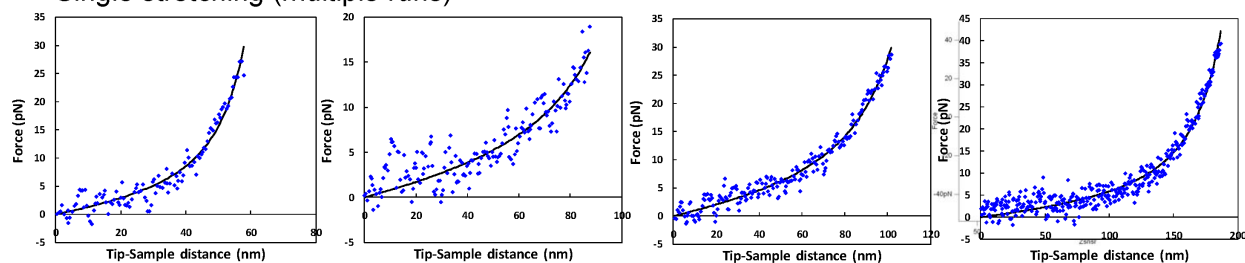

#### B Adhesion + single stretching

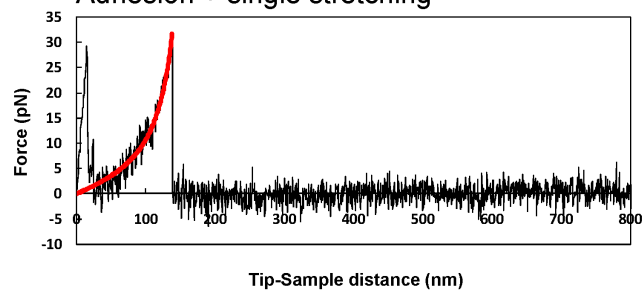

#### C Multiple stretching

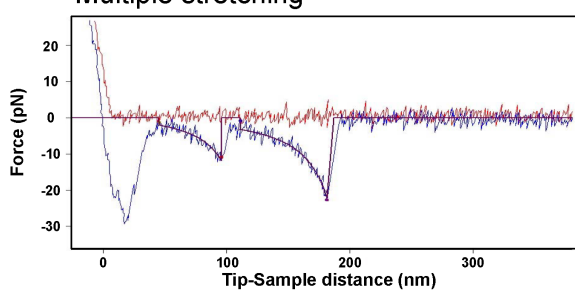

Supplement: pone.0217897.s011.pdf [file pone.0217897.s011.pdf]
