# Supplementary material for: Interactions of nuclear transport factors and surface-conjugated FG nucleoporins: Insights and limitations
Source: PubMed Central journal article supplement (PMC6553764; doi:10.1371/journal.pone.0217897), 2019-06-06

**S9 Fig. AFM - Nsp1FG pulling experiment in TBT buffer.**

Plots of the WLC model fitting parameters persistence length,  $L_p$  (blue), and contour length,  $L_c$  (green), versus the adhesion force,  $F_{ad}$ , from pulling sNsp1 at  $1 \mu\text{m/s}$  in TBT buffer. Histograms (grey) represent the frequencies of  $L_p$ ,  $L_c$  and  $F_{ad}$ . In the  $L_p$  plot, the average (solid line)  $\pm 1$  standard deviation (dash line) are also reported.

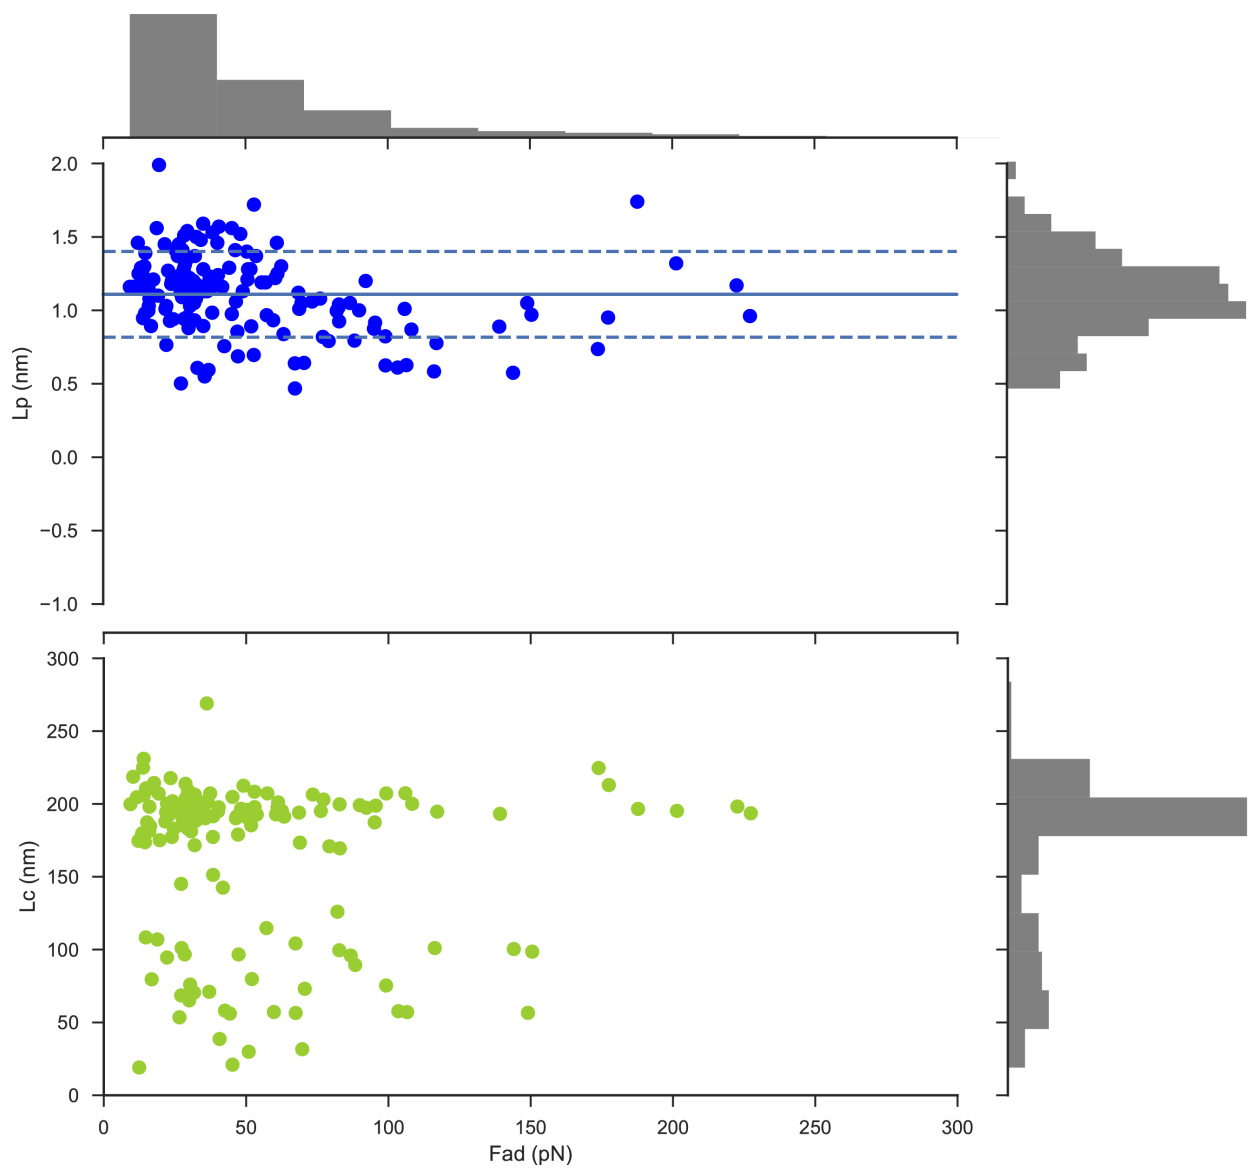

Supplement: pone.0217897.s012.pdf [file pone.0217897.s012.pdf]
