# Supplementary material for: Interactions of nuclear transport factors and surface-conjugated FG nucleoporins: Insights and limitations
Source: PubMed Central journal article supplement (PMC6553764; doi:10.1371/journal.pone.0217897), 2019-06-06

**S10 Fig. AFM - Stretching Nsp1 in PBS at different pulling rates.**

Plots of the WLC model fitting parameters persistence length,  $L_p$  (blue, top row), and contour length,  $L_C$  (green, bottom row), versus the adhesion force,  $F_{ad}$ , from pulling sNsp1 at (A) 3  $\mu\text{m/s}$ , (B) 2  $\mu\text{m/s}$  and (C) 1  $\mu\text{m/s}$  in PBS buffer. Histograms (grey) represent the frequencies of  $L_p$ ,  $L_C$  and  $F_{ad}$ . In the  $L_p$  plots, the average (solid line)  $\pm$  1 standard deviation (dash line) are also reported.

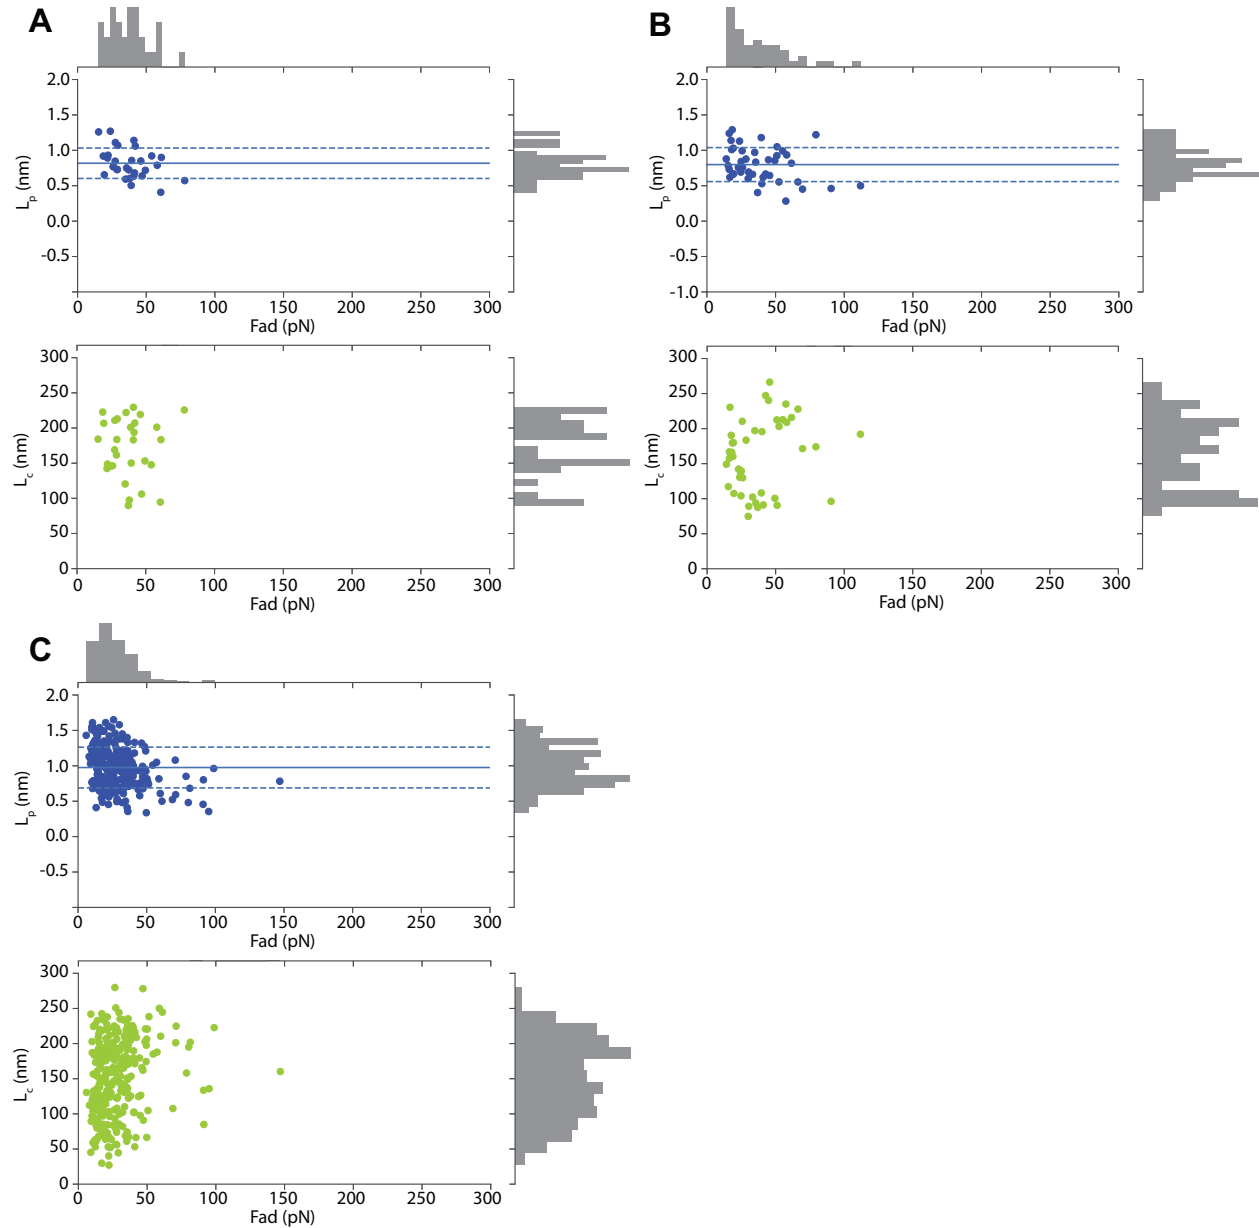

Supplement: pone.0217897.s013.pdf [file pone.0217897.s013.pdf]
