# Supplementary material for: Interactions of nuclear transport factors and surface-conjugated FG nucleoporins: Insights and limitations
Source: PubMed Central journal article supplement (PMC6553764; doi:10.1371/journal.pone.0217897), 2019-06-06

### S11 Fig. QCM-D - GST-Kap95 binding with varying binding time.

The data below show 10 s, 30 s, 1 min, 2 min, and 60 min binding of 1  $\mu\text{M}$  GST-Kap95 on an Nsp1FG-modified sensor, followed by a dissociation phase. The curvature of the binding curves indicates that equilibrium was never reached even after 60 min of binding time.  $\Delta F$  and  $\Delta D$  indicate the change in resonance frequency and dissipation for the 5<sup>th</sup> overtone, respectively.

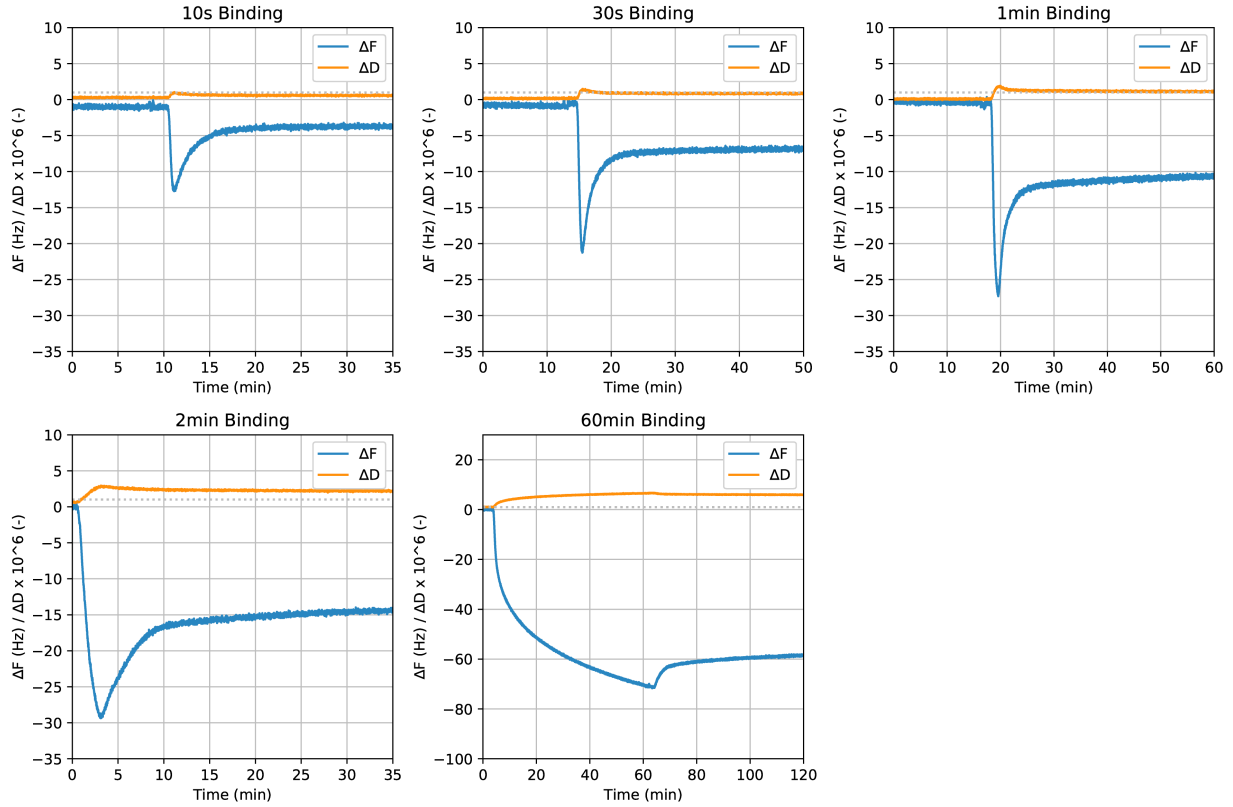

Supplement: pone.0217897.s014.pdf [file pone.0217897.s014.pdf]
