# Supplementary material for: Interactions of nuclear transport factors and surface-conjugated FG nucleoporins: Insights and limitations
Source: PubMed Central journal article supplement (PMC6553764; doi:10.1371/journal.pone.0217897), 2019-06-06

**S12 Fig. SPR - Non-specific binding on a bare surface passivated with beta-mercaptoethanol.**

Kap95 bindings on FSFG<sub>6</sub> (A-D) and a bare SPR surface passivated with beta-mercaptoethanol (E-H) are shown. Different rows indicate different lengths of the association phase: (A, E) 15 s, (B, F) 30 s, (C, G) 60 s, and (D, H) 120 s. While the SPR response on FSFG<sub>6</sub> surface was dependent on Kap95 concentration, it was not for the unconjugated, plain surface. The response came down to zero upon the onset of dissociation phase, suggesting that the plain surface was inert to Kap95.

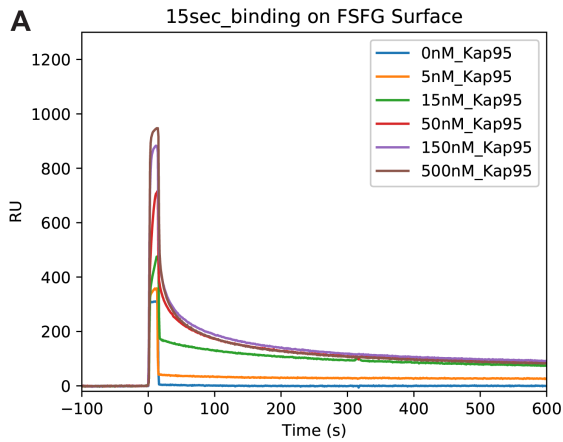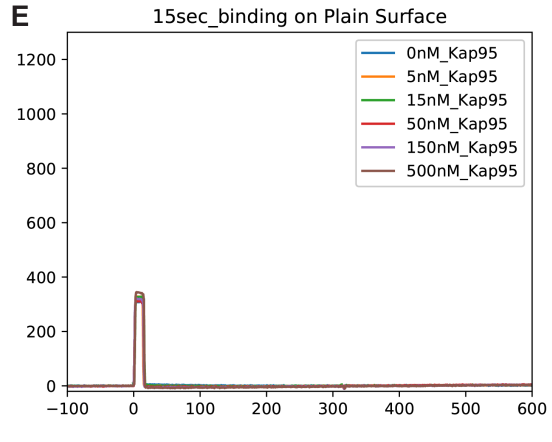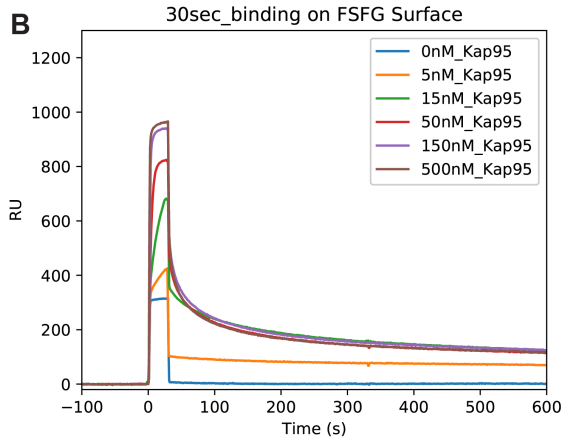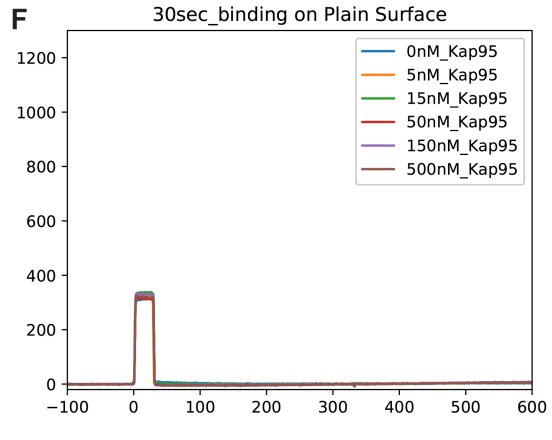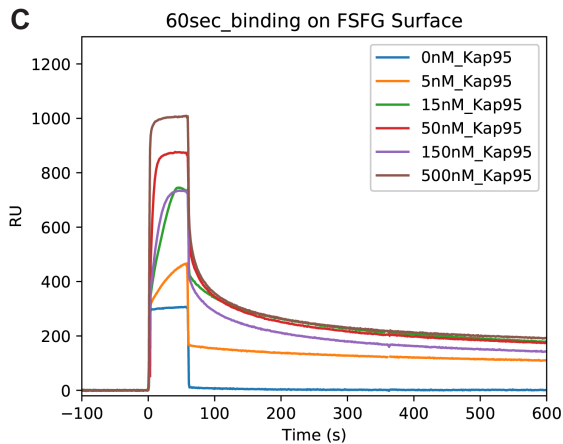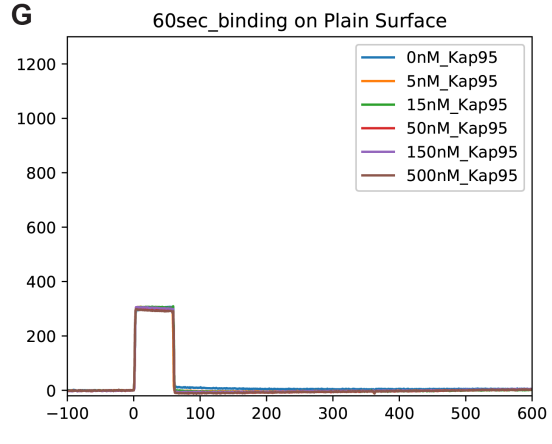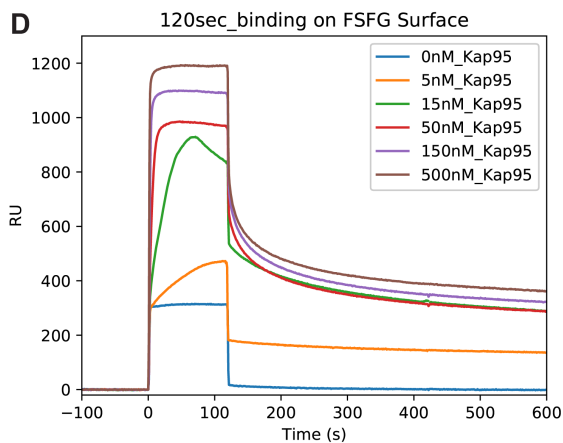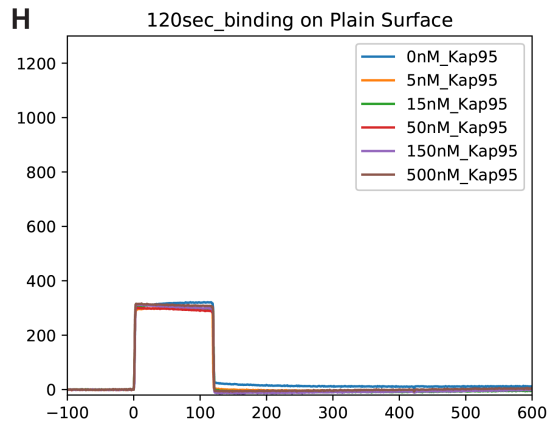

Supplement: pone.0217897.s015.pdf [file pone.0217897.s015.pdf]
