# Supplementary material for: Interactions of nuclear transport factors and surface-conjugated FG nucleoporins: Insights and limitations
Source: PubMed Central journal article supplement (PMC6553764; doi:10.1371/journal.pone.0217897), 2019-06-06

**S13 Fig. SPR - Kap95 binding experiments.**

Both association and dissociation phases of the Kap95 binding experiments are shown below. Rows indicate different FSFG<sub>6</sub> densities on the surface, and the columns indicate lengths of the association phase. The analysis of the dissociation phase from these experiments is shown in Fig. 4B.

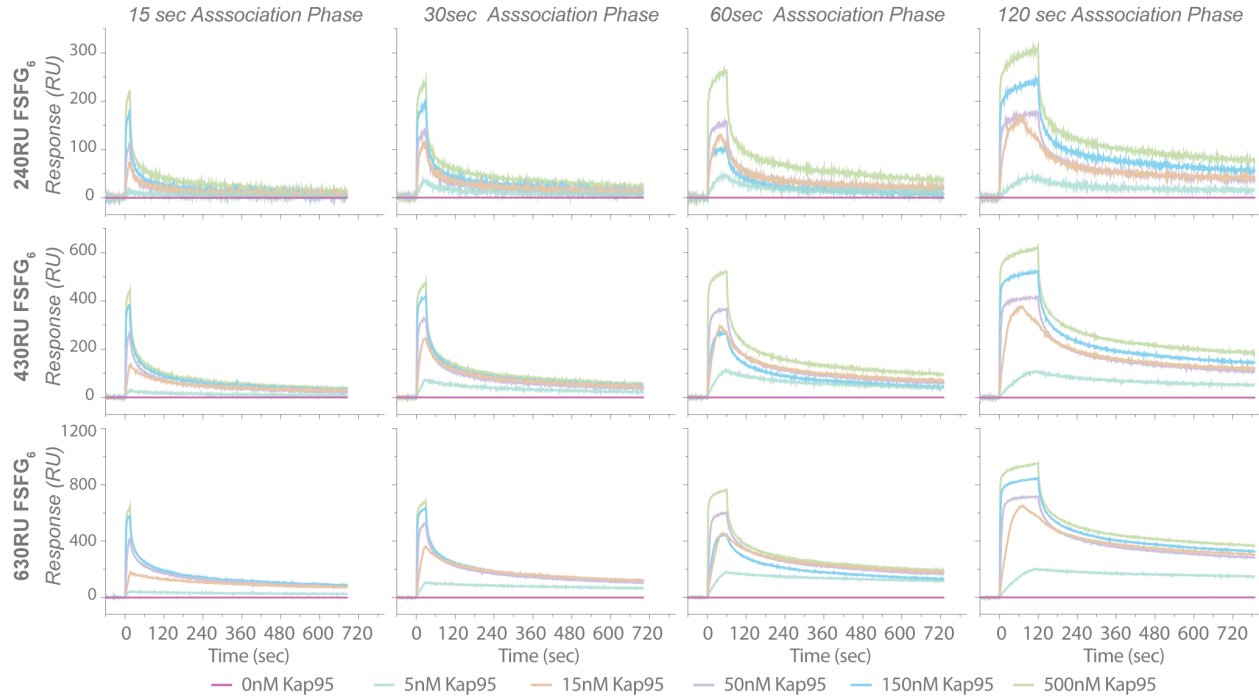

Supplement: pone.0217897.s016.pdf [file pone.0217897.s016.pdf]
