# Supplementary material for: Interactions of nuclear transport factors and surface-conjugated FG nucleoporins: Insights and limitations
Source: PubMed Central journal article supplement (PMC6553764; doi:10.1371/journal.pone.0217897), 2019-06-06

**S15 Fig. SPR - Fitting various kinetic models to binding curves.**

SPR binding curves were fit to various kinetic models: one-to-one (A), one-to-one with MTL (B), two state models (C), heterogeneous ligand (D), and heterogeneous analyte (E) Binding curves on surfaces with different FSFG<sub>6</sub> densities are shown (columns (i) 425 RU, (ii) 550 RU, (iii) 791 RU). Data here are from a replicate experiment of the one shown in Fig. 4. Solid and dotted lines indicate the obtained sensorgrams and the respective fitted curves, respectively Kap95 concentrations are indicated in different colors. See S2 Table for the fitted parameters values.

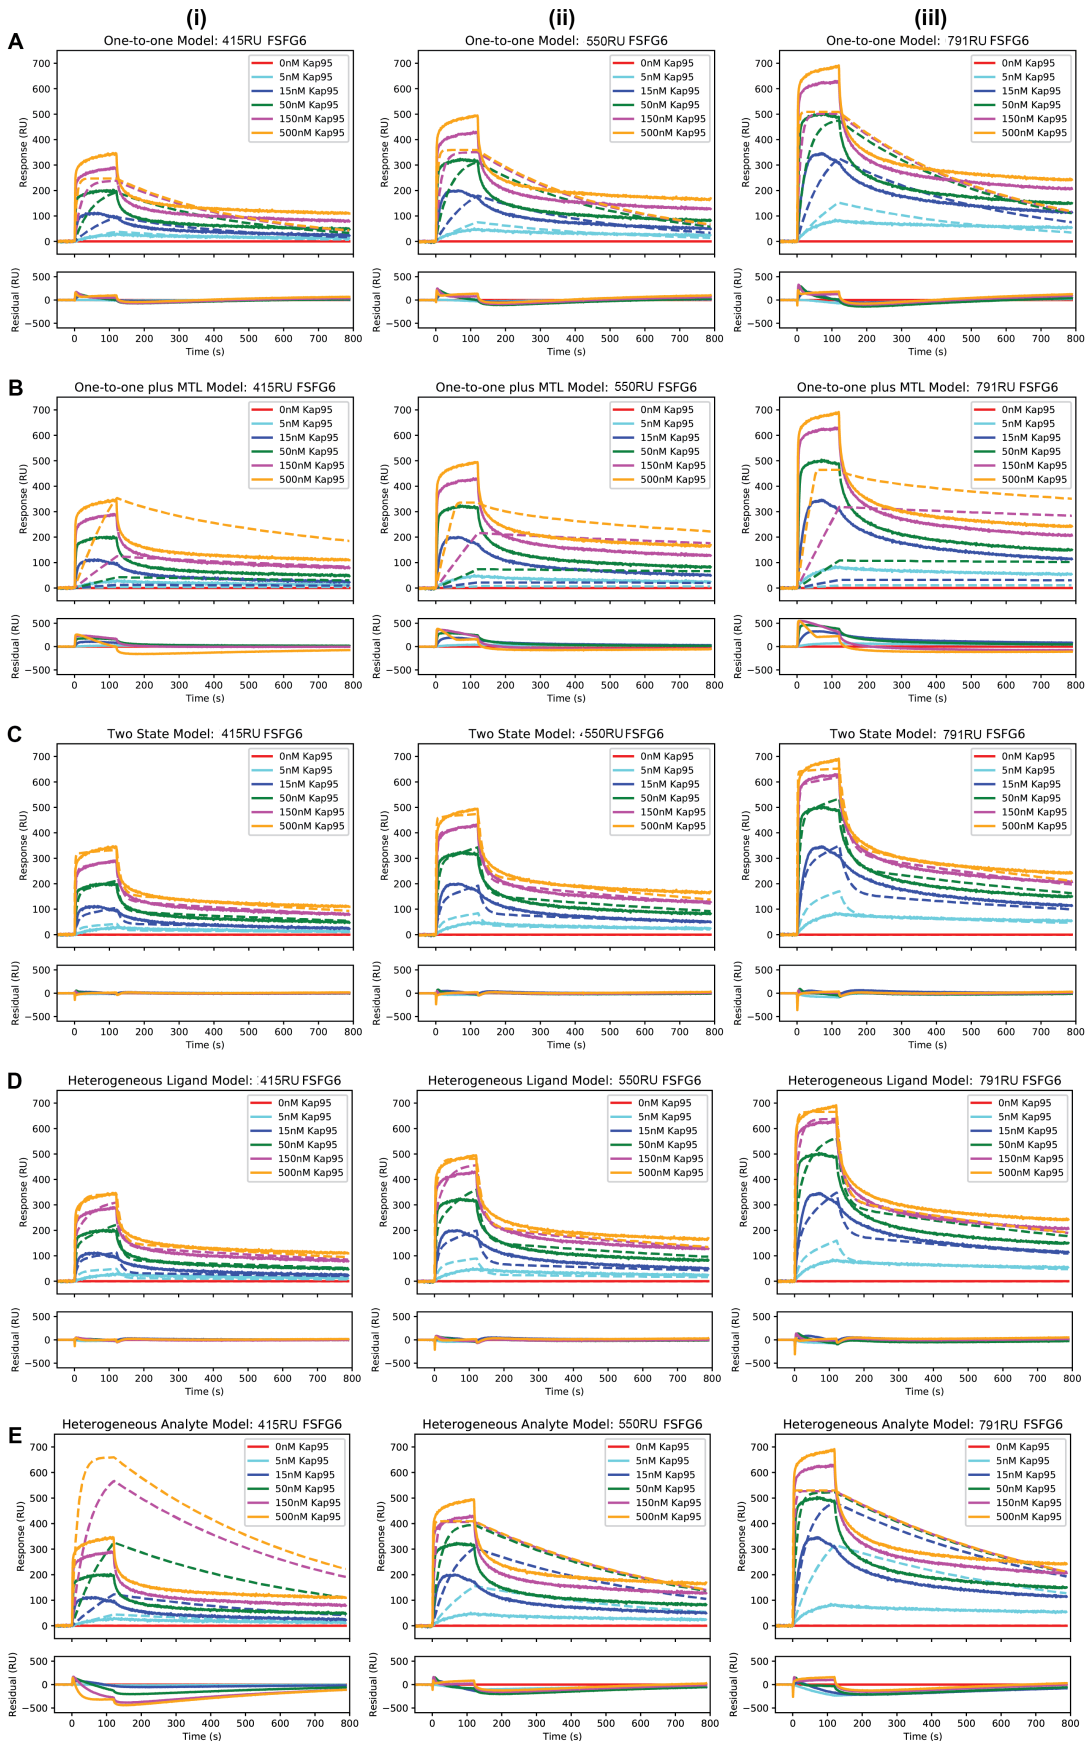

Supplement: pone.0217897.s018.pdf [file pone.0217897.s018.pdf]
