# Supplementary material for: Interactions of nuclear transport factors and surface-conjugated FG nucleoporins: Insights and limitations
Source: PubMed Central journal article supplement (PMC6553764; doi:10.1371/journal.pone.0217897), 2019-06-06

**S16 Fig. QCM-D - Conjugation of FSFG<sub>6</sub> and SSSG<sub>6</sub> to silica sensors.**

The changes in frequency ( $\Delta F$ ) and energy dissipation ( $\Delta D$ ) for several overtones were recorded in real time during (A) FSFG<sub>6</sub> and (B) SSSG<sub>6</sub> conjugations. The overlapping of the different harmonics is indicative of the rigid nature of these layers. (C-D) Sauerbrey model was used to calculate the layer thickness, for different layer densities (1,100, 1,200 and 1,300 kg/m<sup>3</sup>).

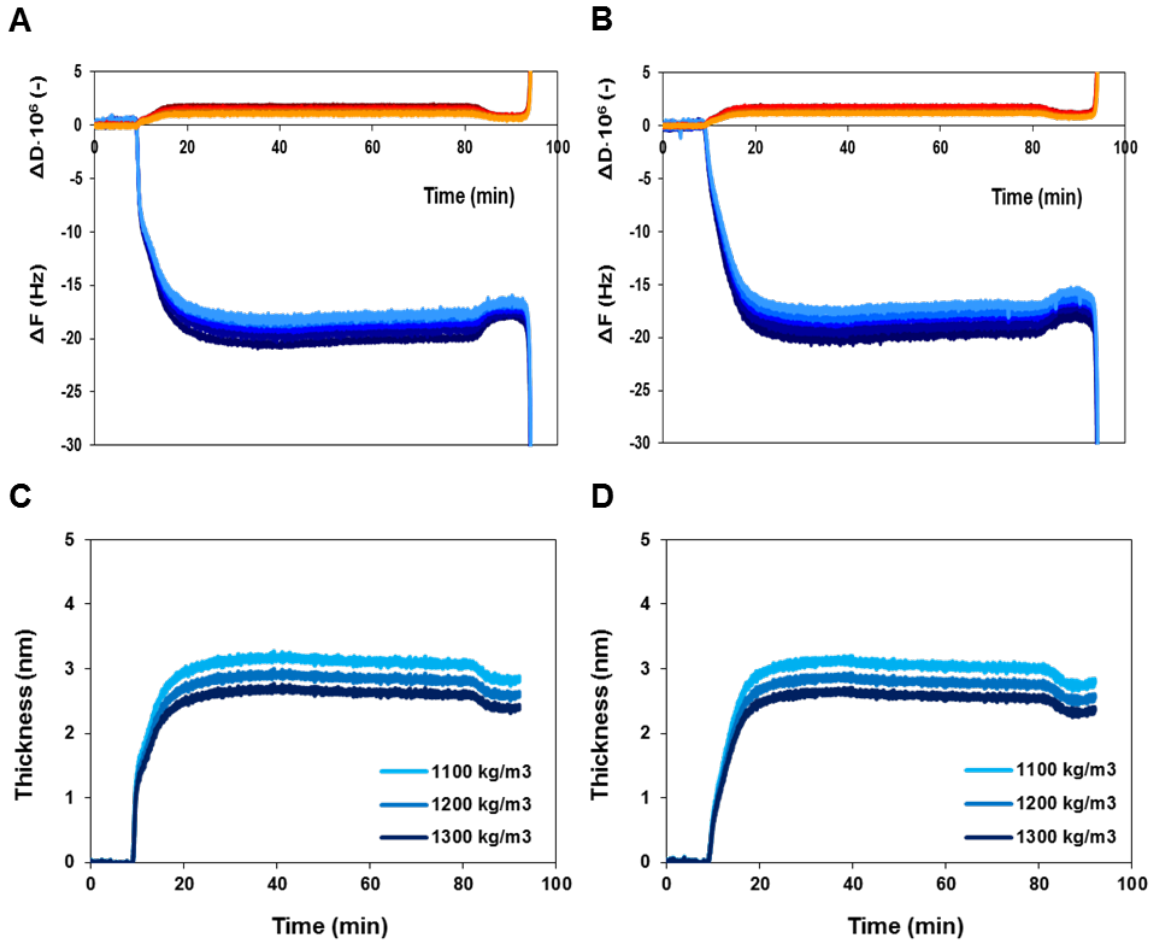

Supplement: pone.0217897.s019.pdf [file pone.0217897.s019.pdf]
