# Supplementary material for: Interactions of nuclear transport factors and surface-conjugated FG nucleoporins: Insights and limitations
Source: PubMed Central journal article supplement (PMC6553764; doi:10.1371/journal.pone.0217897), 2019-06-06
Supplement: pone.0217897.s020.pdf [file pone.0217897.s020.pdf]

**S1 Table. SPR - Numerical simulation parameters.**

Summary of the parameters used for the SPR numerical simulations in S13 Fig.

| Parameter description             | Value                          | Units                   |
|-----------------------------------|--------------------------------|-------------------------|
| <b><i>SPR geometry</i></b>        |                                |                         |
| Channel depth, D                  | $1 \cdot 10^{-3}$              | m                       |
| Channel width, W                  | $1 \cdot 10^{-3}$              | m                       |
| Channel height, H                 | $5 \cdot 10^{-4}$              | m                       |
| Chamber volume, D·W·H             | $5 \cdot 10^{-10}$             | m <sup>3</sup>          |
| Surface area for adsorption, D·W  | $1 \cdot 10^{-6}$              | m <sup>2</sup>          |
| Outlet surface area, D·H          | $5 \cdot 10^{-7}$              | m <sup>2</sup>          |
| <b><i>Flow properties</i></b>     |                                |                         |
| Inlet velocity <sup>a</sup>       | $(0.3 - 3 - 30) \cdot 10^{-3}$ | m/s                     |
| H <sub>2</sub> O concentration    | 55,000                         | mol/m <sup>3</sup>      |
| H <sub>2</sub> O viscosity        | $8.9 \cdot 10^{-4}$            | Pa·s                    |
| H <sub>2</sub> O molecular weight | 18                             | g/mol                   |
| H <sub>2</sub> O density          | 1,000                          | kg/m <sup>3</sup>       |
| Temperature                       | 298                            | K                       |
| <b><i>Ligand</i></b>              |                                |                         |
| Molecular weight, MW <sub>L</sub> | 28,771                         | g/mol                   |
| Experimental RU <sup>b</sup>      | 500 - 1,500                    | -                       |
| Total binding sites <sup>c</sup>  | (RU/1,000)/MW <sub>L</sub>     | mol/m <sup>2</sup>      |
| <b><i>Analyte</i></b>             |                                |                         |
| Molecular weight, MW <sub>A</sub> | 15,565                         | g/mol                   |
| Inlet concentration               | $5 \cdot 10^{-5}$              | mol/m <sup>3</sup>      |
| <b><i>Binding</i></b>             |                                |                         |
| Adsorption rate constant          | $2 \cdot 10^2$                 | mol/(m <sup>3</sup> ·s) |
| Desorption rate constant          | $2 \cdot 10^{-3}$              | 1/s                     |

<sup>a</sup> The feed velocity was 3 mm/s, corresponding to the experimental 100 μL/min, for S13A-B Fig, while it was varied from 0.3 to 30 mm/s for S13C-F Fig.

<sup>b</sup> Experimental SPR response unit (RU) signal was 1,500 (i.e. high ligand density) for S13A-B Fig and 500 (i.e. medium ligand density) for S13C-F Fig.

<sup>c</sup> It was calculated using the correlation 1 RU = 1,000 ng/mm<sup>2</sup>.
