# Supplementary material for: Interactions of nuclear transport factors and surface-conjugated FG nucleoporins: Insights and limitations
Source: PubMed Central journal article supplement (PMC6553764; doi:10.1371/journal.pone.0217897), 2019-06-06
Supplement: pone.0217897.s021.pdf [file pone.0217897.s021.pdf]

**S2 Table. SPR - Fitting kinetic and equilibrium models to binding curves**

SPR binding curves (solid lines in S14 Fig) were fit to various kinetic models: one-to-one, one-to-one with MTL, heterogeneous ligands, heterogeneous analytes, and two state models. Langmuir isotherm analysis was also included. FG density refers to the amount of FSFG<sub>6</sub> conjugated on the SPR sensors: low (415 RU), medium (550 RU) and high (791 RU). Binding time indicate the length of the association phase: 15, 30, 60 and 120 seconds.

*One-to-one model*

| FG Density | Binding Time (s) | ka (10 <sup>5</sup> 1/Ms) | kd (10 <sup>-3</sup> 1/s) | KD (10 <sup>-9</sup> M) | R <sub>max</sub> (RU) | Chi <sup>2</sup> (RU) |
|------------|------------------|---------------------------|---------------------------|-------------------------|-----------------------|-----------------------|
| Low        | 15               | 10.80                     | 3.70                      | 3.42                    | 142.4                 | 516                   |
|            | 30               | 5.32                      | 3.01                      | 5.65                    | 182.6                 | 711                   |
|            | 60               | 5.49                      | 3.01                      | 5.49                    | 218.0                 | 1173                  |
|            | 120              | 3.21                      | 2.61                      | 8.14                    | 251.5                 | 1154                  |
| Medium     | 15               | 20.70                     | 3.03                      | 1.46                    | 222.4                 | 974                   |
|            | 30               | 8.10                      | 2.65                      | 3.27                    | 279.8                 | 1403                  |
|            | 60               | 8.73                      | 2.75                      | 3.15                    | 319.5                 | 2349                  |
|            | 120              | 4.59                      | 2.50                      | 5.45                    | 362.8                 | 2383                  |
| High       | 15               | 24.10                     | 2.09                      | 0.87                    | 386.7                 | 1643                  |
|            | 30               | 9.97                      | 1.99                      | 1.99                    | 442.5                 | 2364                  |
|            | 60               | 12.9                      | 2.20                      | 1.70                    | 470.7                 | 4077                  |
|            | 120              | 6.82                      | 2.19                      | 3.20                    | 512.5                 | 4249                  |

*One-to-one plus mass transport limitation model*

| FG Density | Binding Time (s) | ka (10 <sup>5</sup> 1/Ms) | kd (10 <sup>-3</sup> 1/s) | KD (10 <sup>-9</sup> M) | R <sub>max</sub> (RU) | kt (10 <sup>4</sup> RU/Ms) | Chi <sup>2</sup> (RU) |
|------------|------------------|---------------------------|---------------------------|-------------------------|-----------------------|----------------------------|-----------------------|
| Low        | 15               | 9.75                      | 6.53                      | 6.70                    | 208.0                 | 1                          | 2129                  |
|            | 30               | 42.90                     | 4.49                      | 1.05                    | 74.6                  | 991                        | 1642                  |
|            | 60               | 9.05                      | 4.09                      | 4.52                    | 227.6                 | 877                        | 2973                  |
|            | 120              | 1.15                      | 3.26                      | 28.30                   | 434.2                 | 849                        | 5035                  |
| Medium     | 15               | 25.60                     | 4.65                      | 1.82                    | 166.8                 | 1                          | 6896                  |
|            | 30               | 44.50                     | 3.30                      | 0.74                    | 99.0                  | 1560                       | 5199                  |
|            | 60               | 15.50                     | 3.86                      | 2.49                    | 271.2                 | 1210                       | 7340                  |
|            | 120              | 8.51                      | 3.18                      | 3.74                    | 338.2                 | 1290                       | 7949                  |
| High       | 15               | 3.58                      | 3.35                      | 9.36                    | 754.9                 | 1                          | 27110                 |
|            | 30               | 35.70                     | 2.70                      | 0.76                    | 127.6                 | 3850                       | 17795                 |
|            | 60               | 28.30                     | 3.14                      | 1.11                    | 315.9                 | 1840                       | 21187                 |
|            | 120              | 16.60                     | 2.75                      | 1.65                    | 466.0                 | 1830                       | 20928                 |

*Heterogeneous analytes model*

| FG Density | Binding Time (s) | ka (10 <sup>5</sup> 1/Ms) | kd (10 <sup>-3</sup> 1/s) | KD (10 <sup>-9</sup> M) | R <sub>max</sub> (RU) | ka <sub>2</sub> (10 <sup>5</sup> 1/Ms) | kd <sub>2</sub> (10 <sup>-3</sup> 1/s) | KD <sub>2</sub> (10 <sup>-9</sup> M) | Chi <sup>2</sup> (RU) |
|------------|------------------|---------------------------|---------------------------|-------------------------|-----------------------|----------------------------------------|----------------------------------------|--------------------------------------|-----------------------|
| Low        | 15               | 1.67                      | 3.27                      | 19.60                   | 515.0                 | 1.67                                   | 3.27                                   | 19.60                                | 6092                  |
|            | 30               | 21.9                      | 2.24                      | 1.03                    | 80.5                  | 21.90                                  | 2.24                                   | 1.03                                 | 1341                  |
|            | 60               | 4.66                      | 2.04                      | 4.38                    | 282.1                 | 4.66                                   | 2.04                                   | 4.38                                 | 3784                  |
|            | 120              | 0.612                     | 1.63                      | 26.60                   | 677.2                 | 0.61                                   | 1.63                                   | 26.60                                | 27094                 |
| Medium     | 15               | 12.3                      | 2.33                      | 1.89                    | 258.3                 | 12.30                                  | 2.33                                   | 1.89                                 | 1710                  |
|            | 30               | 22.5                      | 1.65                      | 0.73                    | 107.4                 | 22.50                                  | 1.65                                   | 0.73                                 | 3789                  |
|            | 60               | 7.89                      | 1.93                      | 2.45                    | 363.5                 | 7.89                                   | 1.93                                   | 2.45                                 | 5473                  |
|            | 120              | 4.36                      | 1.59                      | 3.65                    | 411.3                 | 4.36                                   | 1.59                                   | 3.65                                 | 7967                  |
| High       | 15               | 4.63                      | 1.68                      | 3.62                    | 641.9                 | 4.63                                   | 1.68                                   | 3.62                                 | 10615                 |
|            | 30               | 18.8                      | 1.35                      | 0.72                    | 157.8                 | 18.80                                  | 1.35                                   | 0.72                                 | 12260                 |
|            | 60               | 14.9                      | 1.57                      | 1.05                    | 380.1                 | 14.90                                  | 1.57                                   | 1.05                                 | 5768                  |
|            | 120              | 8.4                       | 1.37                      | 1.64                    | 530.4                 | 8.40                                   | 1.37                                   | 1.64                                 | 13870                 |

*Heterogeneous ligands model*

| FG Density | Binding Time (s) | ka (10 <sup>5</sup> 1/Ms) | kd (10 <sup>-3</sup> 1/s) | KD (10 <sup>-9</sup> M) | R <sub>max</sub> (RU) | ka <sub>2</sub> (10 <sup>5</sup> 1/Ms) | kd <sub>2</sub> (10 <sup>-3</sup> 1/s) | KD <sub>2</sub> (10 <sup>-9</sup> M) | Chi <sup>2</sup> (RU) |
|------------|------------------|---------------------------|---------------------------|-------------------------|-----------------------|----------------------------------------|----------------------------------------|--------------------------------------|-----------------------|
| Low        | 15               | 31.90                     | 85.4                      | 26.70                   | 243.0                 | 4.27                                   | 1.19                                   | 2.77                                 | 83                    |
|            | 30               | 20.10                     | 80.2                      | 39.90                   | 251.9                 | 2.61                                   | 1.00                                   | 3.84                                 | 87                    |
|            | 60               | 38.90                     | 82.7                      | 21.30                   | 228.7                 | 1.95                                   | 0.87                                   | 4.43                                 | 159                   |
|            | 120              | 1.38                      | 0.7                       | 5.12                    | 152.9                 | 33.20                                  | 71.90                                  | 21.70                                | 125                   |
| Medium     | 15               | 20.10                     | 1.5                       | 0.76                    | 142.6                 | 20.50                                  | 74.90                                  | 36.50                                | 222                   |
|            | 30               | 5.72                      | 1.1                       | 1.99                    | 183.2                 | 18.30                                  | 68.20                                  | 37.30                                | 248                   |
|            | 60               | 4.48                      | 1.0                       | 2.14                    | 198.5                 | 39.50                                  | 68.80                                  | 17.40                                | 467                   |
|            | 120              | 2.17                      | 0.7                       | 3.32                    | 219.6                 | 35.70                                  | 57.70                                  | 16.20                                | 368                   |
| High       | 15               | 15.10                     | 54.6                      | 36.20                   | 452.5                 | 25.60                                  | 1.28                                   | 0.50                                 | 360                   |
|            | 30               | 9.39                      | 1.0                       | 1.09                    | 317.6                 | 14.50                                  | 57.00                                  | 39.30                                | 373                   |
|            | 60               | 11.60                     | 1.0                       | 0.83                    | 310.4                 | 26.10                                  | 60.00                                  | 23.00                                | 918                   |
|            | 120              | 4.86                      | 0.8                       | 1.60                    | 321.8                 | 31.90                                  | 54.10                                  | 17.00                                | 823                   |

*Two state model*

| FG Density | Binding Time (s) | ka (10 <sup>5</sup> 1/Ms) | kd (10 <sup>-3</sup> 1/s) | KD (10 <sup>-9</sup> M) | R <sub>max</sub> (RU) | ka <sub>2</sub> (10 <sup>-3</sup> 1/s) | kd <sub>2</sub> (10 <sup>-3</sup> 1/s) | Chi <sup>2</sup> (RU) |
|------------|------------------|---------------------------|---------------------------|-------------------------|-----------------------|----------------------------------------|----------------------------------------|-----------------------|
| Low        | 15               | 18.60                     | 102.0                     | 54.7                    | 357.6                 | 12.10                                  | 1.60                                   | 82                    |
|            | 30               | 11.80                     | 85.5                      | 72.4                    | 384.4                 | 9.91                                   | 1.25                                   | 75                    |
|            | 60               | 18.40                     | 95.4                      | 51.8                    | 372.0                 | 7.17                                   | 1.05                                   | 127                   |
|            | 120              | 14.70                     | 78.6                      | 53.3                    | 352.7                 | 5.24                                   | 0.86                                   | 78                    |
| Medium     | 15               | 28.20                     | 55.7                      | 19.8                    | 453.6                 | 12.80                                  | 1.80                                   | 194                   |
|            | 30               | 14.30                     | 56.9                      | 39.8                    | 521.7                 | 10.60                                  | 1.35                                   | 177                   |
|            | 60               | 22.20                     | 64.0                      | 28.8                    | 508.4                 | 7.42                                   | 1.09                                   | 316                   |
|            | 120              | 17.00                     | 60.1                      | 35.3                    | 492.5                 | 5.29                                   | 0.87                                   | 208                   |
| High       | 15               | 29.90                     | 28.7                      | 9.6                     | 639.8                 | 13.50                                  | 1.79                                   | 428                   |
|            | 30               | 15.40                     | 33.4                      | 21.7                    | 716.3                 | 11.20                                  | 1.28                                   | 369                   |
|            | 60               | 25.20                     | 36.0                      | 14.3                    | 683.6                 | 7.65                                   | 1.05                                   | 801                   |
|            | 120              | 19.30                     | 39.5                      | 20.5                    | 667.4                 | 5.40                                   | 0.84                                   | 523                   |

*Langmuir isotherm*

| <b>FG<br/>Density</b> | <b>Binding<br/>Time (s)</b> | <b>KD<br/>(10<sup>-9</sup> M)</b> | <b>R<sub>max</sub><br/>(RU)</b> | <b>Chi<sup>2</sup><br/>(RU)</b> |
|-----------------------|-----------------------------|-----------------------------------|---------------------------------|---------------------------------|
| Low                   | 15                          | 64.2                              | 382.9                           | 218                             |
|                       | 30                          | 76.8                              | 397.9                           | 345                             |
|                       | 60                          | 43.3                              | 375.5                           | 326                             |
|                       | 120                         | 41.9                              | 357.0                           | 109                             |
| Medium                | 15                          | 59.3                              | 580.4                           | 1293                            |
|                       | 30                          | 63.5                              | 585.4                           | 1382                            |
|                       | 60                          | 30.8                              | 537.1                           | 1042                            |
|                       | 120                         | 30.4                              | 505.7                           | 437                             |
| High                  | 15                          | 64.5                              | 892.1                           | 2203                            |
|                       | 30                          | 54.7                              | 860.3                           | 4405                            |
|                       | 60                          | 22.6                              | 764.5                           | 3062                            |
|                       | 120                         | 22.4                              | 708.9                           | 1519                            |
